# Supplementary material for: Transcriptome Remodeling in Response to Leaf Removal and Exogenous Abscisic Acid in Berries of Grapevine (Vitis vinifera L.) Fruit Cuttings
Source: MDPI journal article supplement (doi:10.3390/horticulturae8100905), 2022-10-03
Supplement: s1 [file s1]

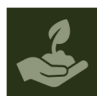

## Article

# Transcriptome Remodeling in Response to Leaf Removal and Exogenous Absciscic Acid in Berries of Grapevine (*Vitis vinifera* L.) Fruit Cuttings

Qian Tong<sup>1,2</sup>, Li Liu<sup>1,2</sup>, Yan Zhao<sup>1</sup>, Junhua Kong<sup>1</sup>, Yongjian Wang<sup>1</sup>, Xiaobo Xu<sup>1,2</sup>, Ghislaine Hilbert<sup>3</sup>, Eric Gomès<sup>3</sup>, Zhanwu Dai<sup>1,2,\*</sup>

<sup>1</sup> Beijing Key Laboratory of Grape Science, CAS Enology and Key Laboratory of Plant Resources, Institute of Botany, The Chinese Academy of Sciences, Beijing 100093, China

<sup>2</sup> University of the Chinese Academy of Sciences, Beijing 100049, China

<sup>3</sup> EGFV, Univ. Bordeaux, Bordeaux Sciences Agro, INRAE, ISVV, F-33882, Villenave d'Ornon, France

\* Correspondence: zhanwu.dai@ibcas.ac.cn

**Citation:** Tong, Q.; Liu, L.; Zhao, Y.; Kong, J.; Wang, Y.; Xu, X.; Hilbert, G.; Gomès, E.; Dai, Z. Transcriptome Remodeling in Response to Leaf Removal and Exogenous Absciscic Acid in Berries of Grapevine (*Vitis vinifera* L.) Fruit Cuttings. *Horticulturae* **2022**, *8*, 905. <https://doi.org/10.3390/horticulturae8100905>

Academic Editors: Paolo Sabbatini and Steven R. Schultze

Received: 15 August 2022

Accepted: 29 September 2022

Published: 3 October 2022

**Publisher's Note:** MDPI stays neutral with regard to jurisdictional claims in published maps and institutional affiliations.

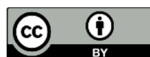

**Copyright:** © 2022 by the authors. Licensee MDPI, Basel, Switzerland. This article is an open access article distributed under the terms and conditions of the Creative Commons Attribution (CC BY) license (<https://creativecommons.org/licenses/by/4.0/>).

Appendix A

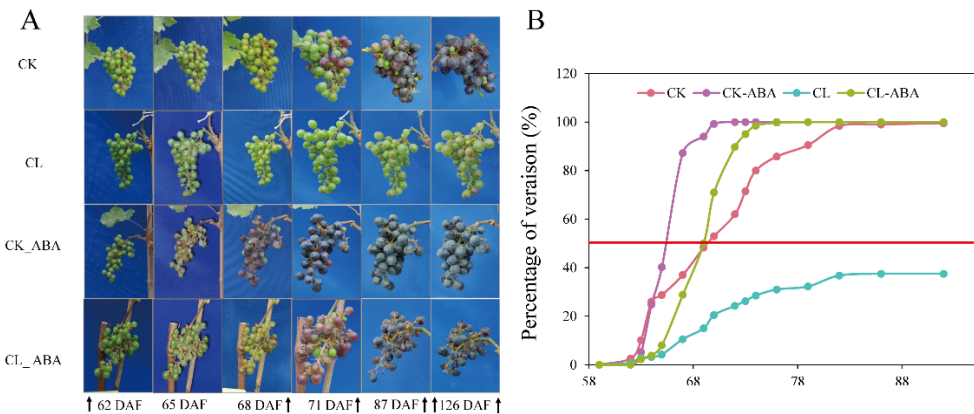

Figure S1. The change of pigment and percentage of veraison of berries during different development stages under carbon limitation and exogenous ABA treatments.

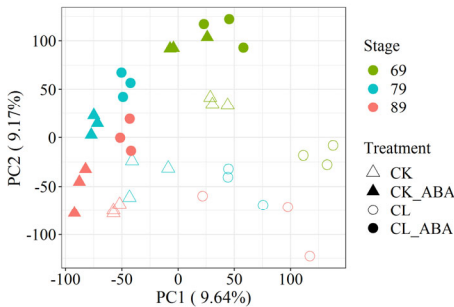

Figure S2. Principal component analysis of berries under different carbon supplies and exogenous ABA treatment during the first three development stages with transcriptome data ( $n=3$ ). Different colors indicated the different treatments and different shapes indicated the different development stages.

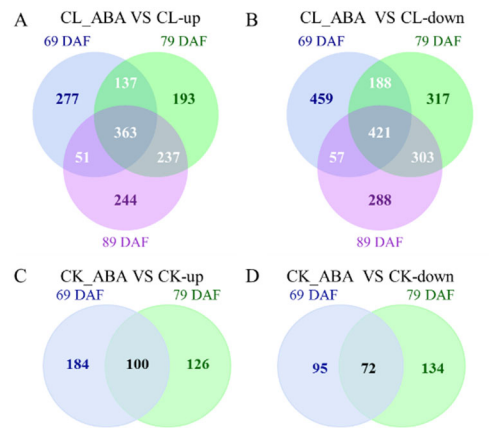

Figure S3. Venn diagram presenting the number of DEGs under ABA treatment with different carbon supplies.

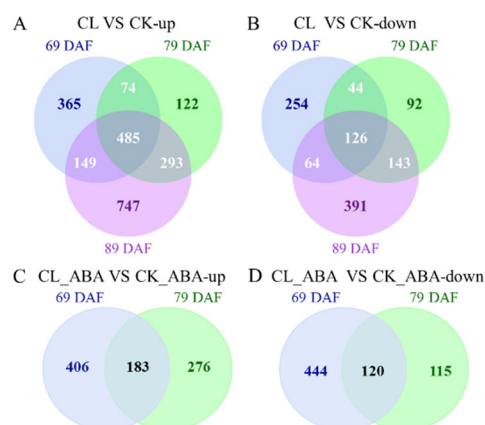

Figure S4. Venn diagram presenting the number of DEGs under carbon limitation with ABA or non-ABA treatment.

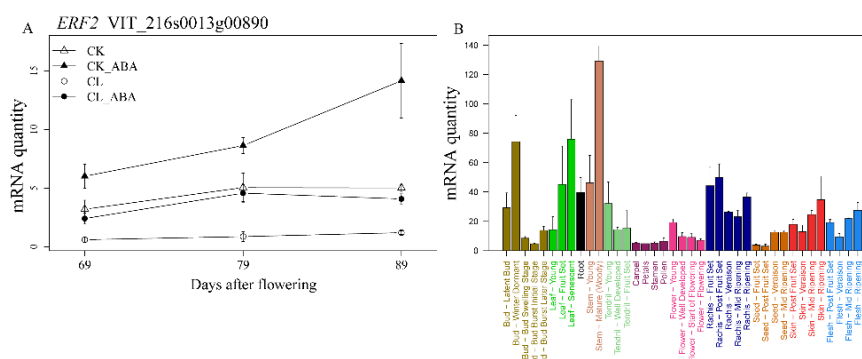

Figure S5. The mRNA quantity of *ERF2* in fruiting cuttings (A) and in different organs during different development stages based on the online transcriptome data (B).

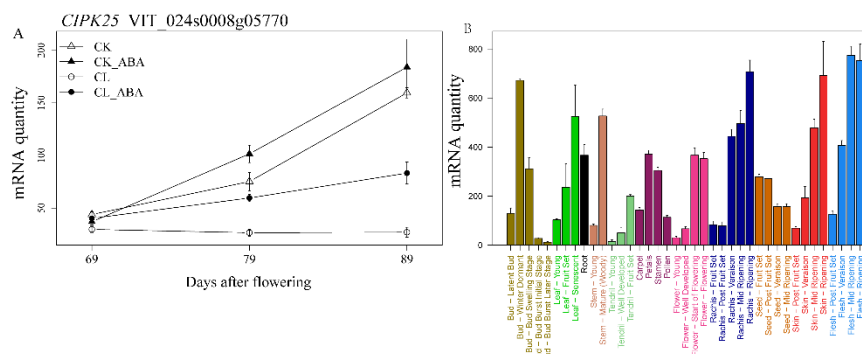

Figure S6. The mRNA quantity of *CIPK25* in fruiting cuttings (A) and in different organs during different development stages based on the online transcriptome data (B).
